# Supplementary material for: Well-defined colloidal crystal films from the 2D self-assembly of core–shell semi-soft nanoparticles
Source: Royal Society of Chemistry journal article supplement (doi:10.1039/c5py00912j), 2015-01-01
Supplement: c5py00912j1.pdf [file c5py00912j1.pdf]

## Supporting Information

### Well-Defined Colloidal Crystal Films from the 2D Self-Assembly of Core-Shell Semi-Soft Nanoparticles

Hadi Sabouri <sup>a</sup>, Kohji Ohno <sup>b</sup>, Sébastien Perrier <sup>c,d,\*</sup>

<sup>a</sup> Key Centre for Polymers & Colloids, School of Chemistry, The University of Sydney, NSW, Australia

<sup>b</sup> Institute for Chemical Research, Kyoto University, Uji, Kyoto 611-0011, Japan.

<sup>c</sup> Department of Chemistry, The University of Warwick, Gibbet Hill, Coventry, CV4 7AL, United Kingdom

<sup>d</sup> Faculty of Pharmacy and Pharmaceutical Sciences, Monash University, 381 Royal Parade, Parkville, VIC 3052, Australia

\* email: s.perrier@warwick.ac.uk; Tel: +44 (0)2476 528085; Fax: +44 (0)2476 524112

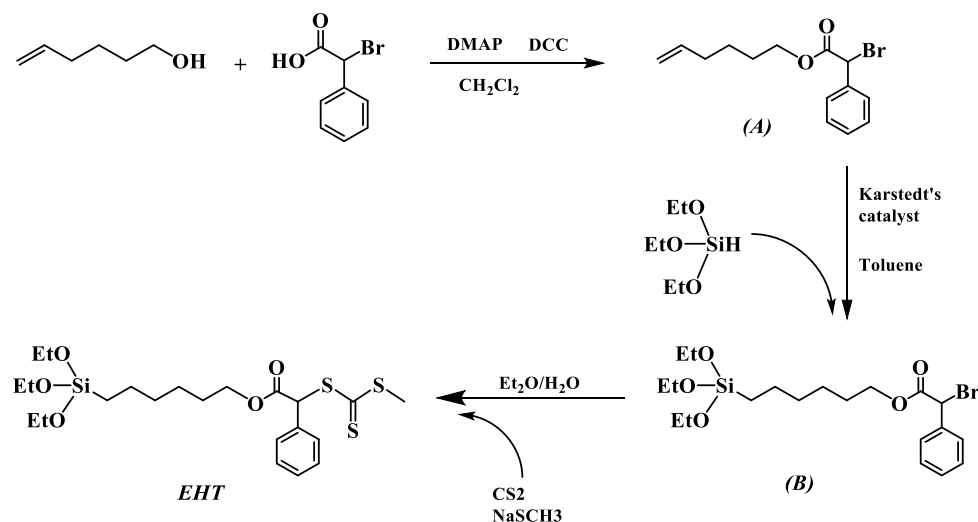

**Scheme S1. Synthetic route of RAFT Agent 6-(Triethoxysilyl)hexyl 2-(((Methylthio)- carbonothioyl)thio)-2-phenylacetate (EHT).**

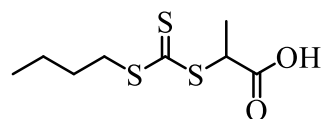

**Figure S1: Structure of RAFT agent, PABTC.**



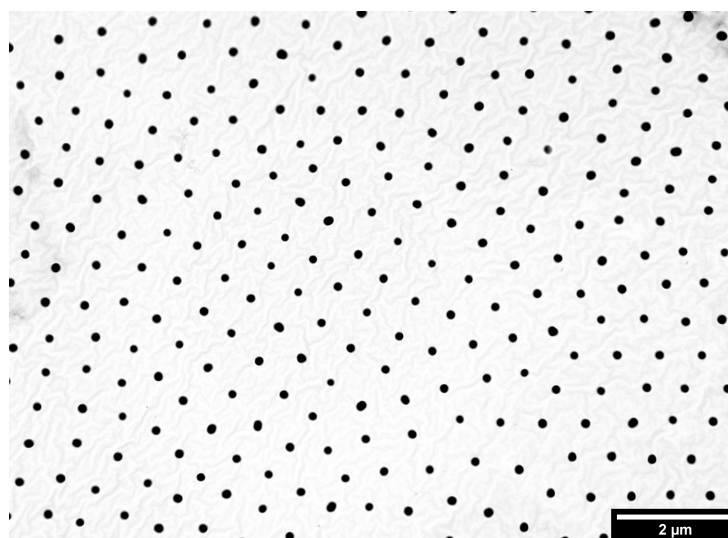

**Figure S3.** TEM image of monolayer film on a TEM grid formed of SiNP-PMMA<sub>2</sub> colloidal hybrid particles deposited on water surface.
